# Supplementary material for: A triple-bridged azido-Cu(ii) chain compound fine-tuned by mixed carboxylate/ethanol linkers displays slow-relaxation and ferromagnetic order: synthesis, crystal structure, magnetic properties and DFT calculations
Source: Royal Society of Chemistry journal article supplement (doi:10.1039/c4dt02195a), 2014-01-01
Supplement: c4dt02195a1.pdf [file c4dt02195a1.pdf]

## Supporting Information

### **A Triple-Bridged Azido-Cu(II) Chain Compound fine-tuned by Mixed Carboxylate/Ethonal linkers Displays Slow-relaxation and Ferromagnetic Order: Synthesis, Crystal structure, Magnetic Property with DFT Calculation**

**Xiangyu Liu,<sup>a,b</sup> Sanping Chen,<sup>a\*</sup> Thais Grancha,<sup>c</sup> Emilio Pardo,<sup>c\*</sup> Hongshan Ke,<sup>a</sup> Bing Yin,<sup>a</sup> Qing Wei,<sup>a</sup> Gang Xie,<sup>a</sup> Shengli Gao<sup>a</sup>**

[a] Key Laboratory of Synthetic and Natural Functional Molecule Chemistry of Ministry of Education, College of Chemistry and Materials Science, Northwest University, Xi'an 710069, China

[b] School of Chemistry and Chemical Engineering, Ningxia University, Yinchuan 750021, China

[c] Departament de Química Inorgànica/Instituto de Ciencia Molecular (ICMol), Universitat de València, 46980 Paterna, València, Spain

#### **Contents**

**Table S1.** Selected bond lengths (Å) and bond angles (°) for **1**

**Figure S1.** PXRD patterns for complex **1**

#### **\*Corresponding author**

**Prof. Sanping Chen**

**Tel.: +86-029-88302604**

**Fax: +86-029-88302604**

**E-mail: sanpingchen@126.com**

#### **\*Corresponding author**

**Prof. Emilio Pardo**

**Tel.: +34 3544442**

**Fax: +34 3543273**

**E-mail: Emilio.Pardo@uv.es**

**Table S1.** Selected Bond Lengths (Å) and Bond Angles (°) for **1**

| <b>1</b>                   |          |                            |          |                    |            |
|----------------------------|----------|----------------------------|----------|--------------------|------------|
| Cu(1)-O(1)                 | 1.950(4) | Cu(1)-N(1)                 | 1.988(5) | O(2)#2-Cu(1)-O(1)  | 178.07(18) |
| Cu(1)-O(3)                 | 2.419(4) | Cu(1)-O(2)#2               | 1.943(4) | Cu(1)-N(1)-Cu(1)#1 | 105.2(2)   |
| Cu(1)-N(1)#2               | 1.989(5) | Cu(1)#1-O(2)               | 1.943(4) | N(3)-N(2)-N(1)     | 179.1(8)   |
| N(1)-N(2)                  | 1.208(7) | N(2)-N(3)                  | 1.131(7) | O(2)-C(1)-O(1)     | 127.0(6)   |
| O(3)-C(8)                  | 1.428(8) | F(1)-C(5)                  | 1.365(7) | O(1)-Cu(1)-N(1)    | 91.00(19)  |
| #1 $-x+3/2, y-1/2, -z+1/2$ |          | #2 $-x+3/2, y+1/2, -z+1/2$ |          |                    |            |

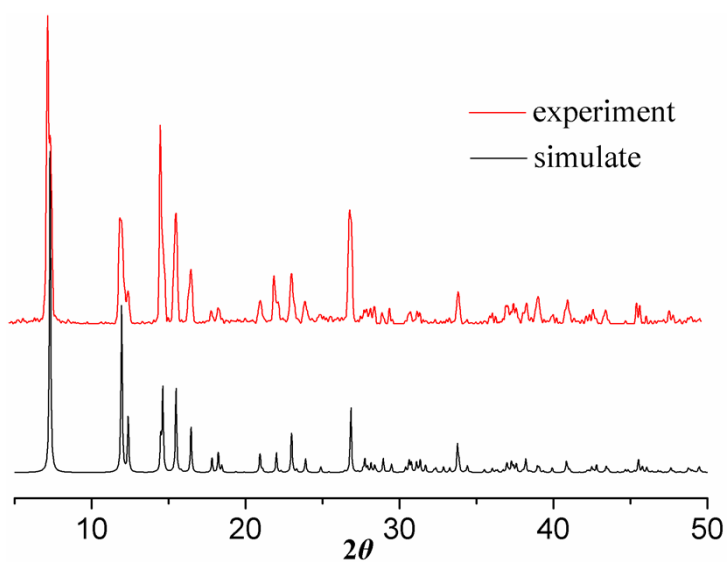**Figure S1.** PXRD patterns for complex **1**.
